# Supplementary material for: Long Non-coding RNA Aerrie Controls DNA Damage Repair via YBX1 to Maintain Endothelial Cell Function
Source: PubMed Central journal article supplement (PMC7829583; doi:10.3389/fcell.2020.619079), 2021-01-11

# Supplement 1

**A**

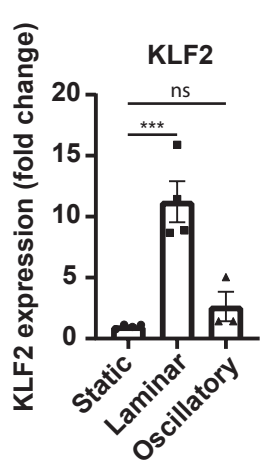

**B**

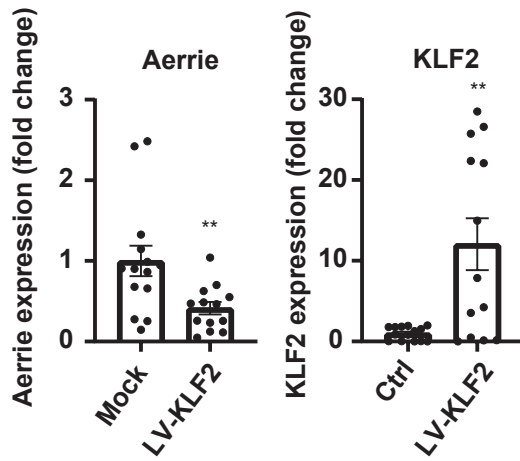

**C**

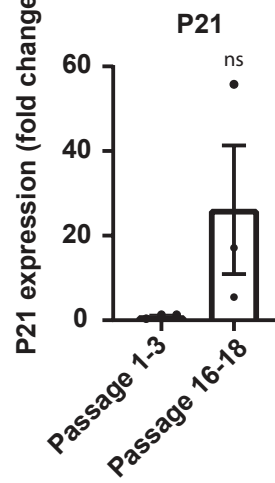

**D**

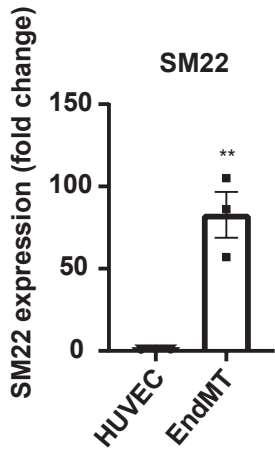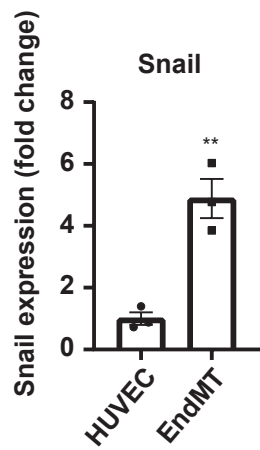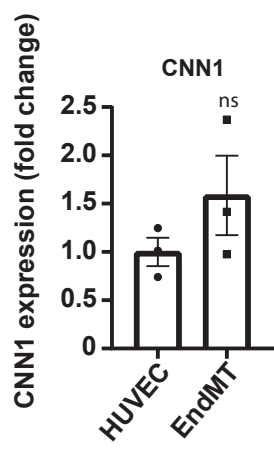

**E**

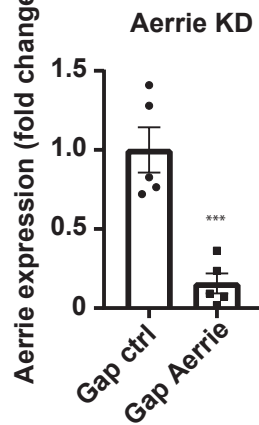

**F**

chr6:132,134,104-132,172,403

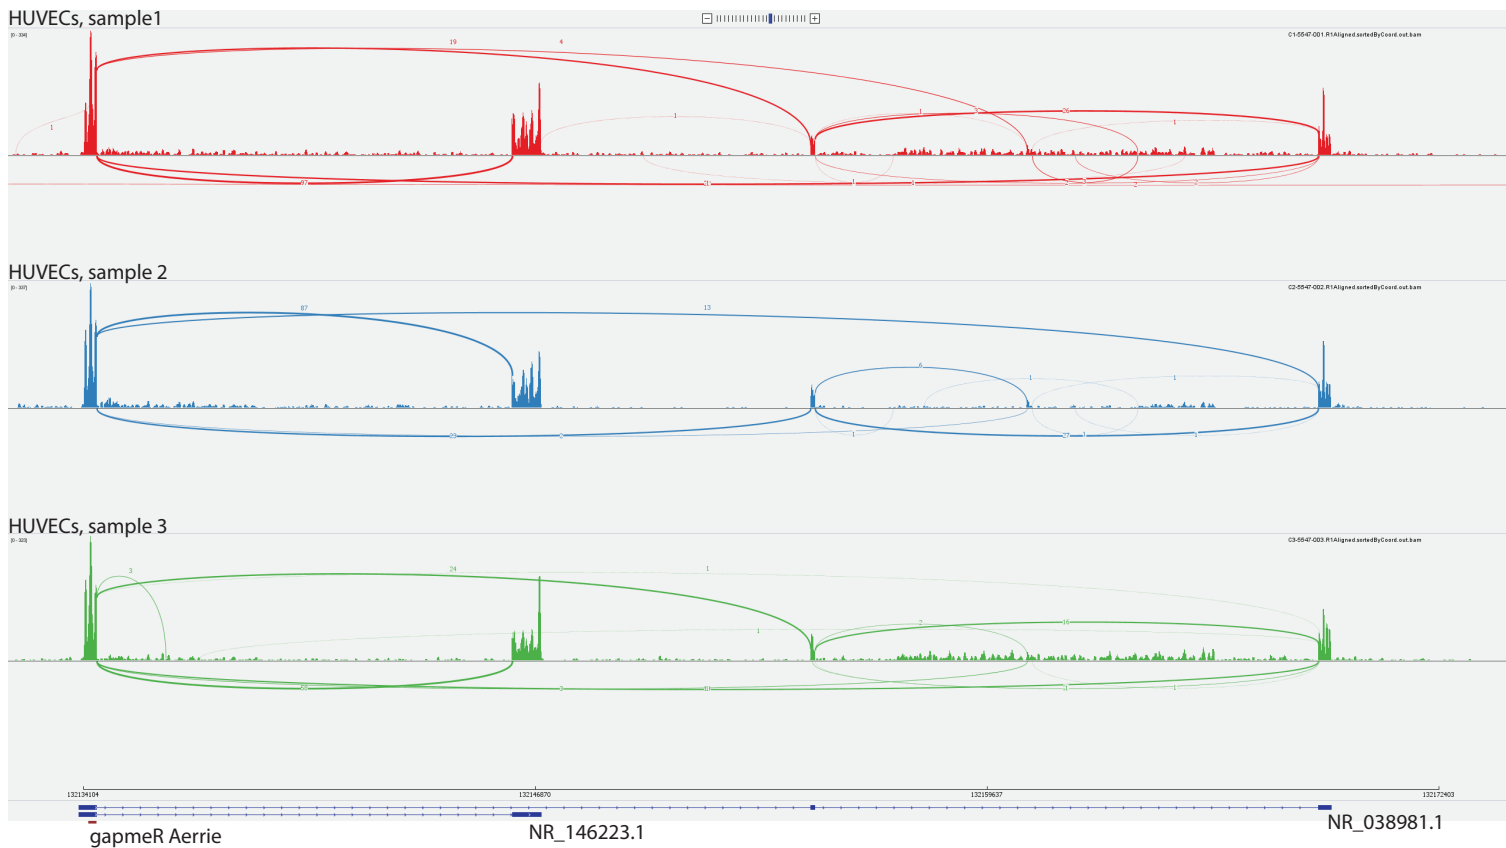

# Supplement 2

A

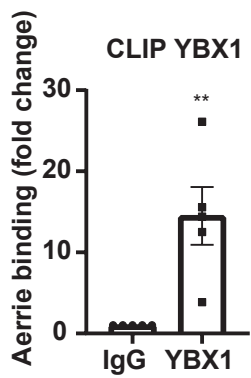

B

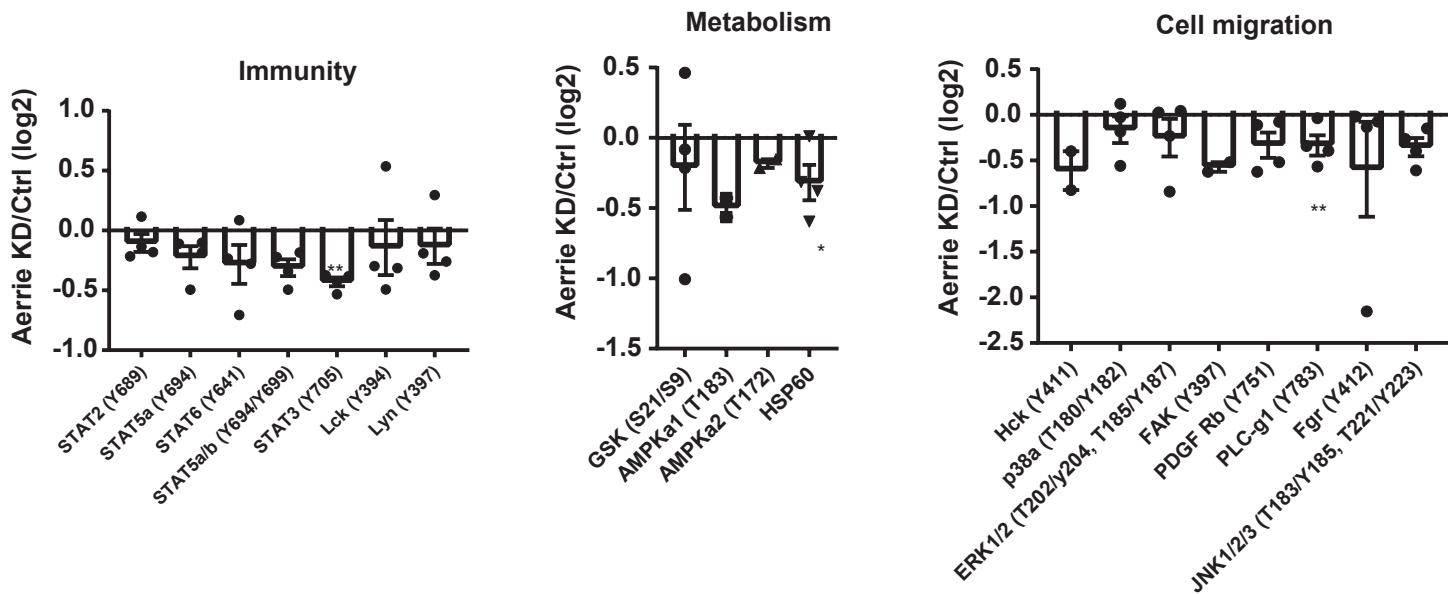

C

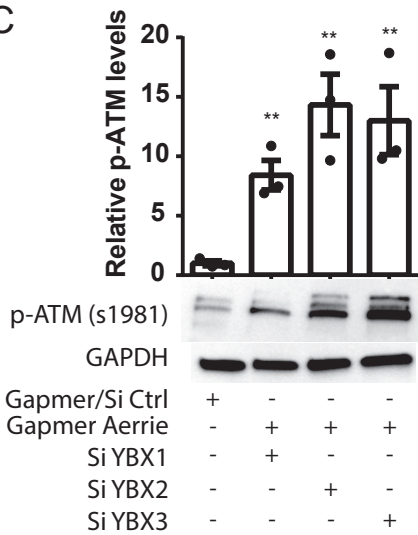

D

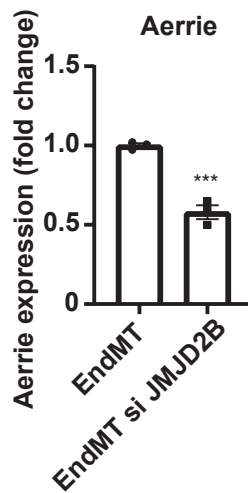

E

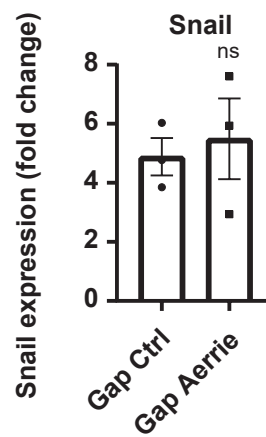

F

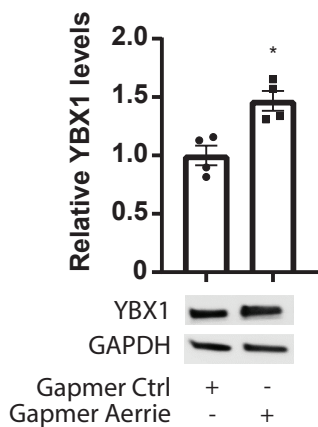

Supplement: Data_Sheet_3.pdf [file Data_Sheet_3.pdf]
